# Supplementary material for: Repertoire of SSRs in the Castor Bean Genome and Their Utilization in Genetic Diversity Analysis inJatropha curcas
Source: Hindawi journal article supplement (doi:10.1155/2011/286089), 2011-01-01
Supplement: f1 [file 286089.f1.pdf]

## Supplementary Materials

**Table S1: List of genotypes used in diversity analysis**

| S.No. | Genotypes     |
|-------|---------------|
| 1     | Urli-Kanchan  |
| 2     | KcJK5         |
| 3     | KcPBS19       |
| 4     | KcPBS15       |
| 5     | KcJK2         |
| 6     | PBS SKS25     |
| 7     | KcPBS16       |
| 8     | KcPBS22       |
| 9     | KcPBS26       |
| 10    | KcJK8         |
| 11    | KcJK1         |
| 12    | KcJK6         |
| 13    | KcJK9         |
| 14    | KcJK3         |
| 15    | KcPBS4        |
| 16    | KcJK10        |
| 17    | PBS SKS21     |
| 18    | PBS SKS20     |
| 19    | Chaterpatti   |
| 20    | PBS SKS22     |
| 21    | KcJK11        |
| 22    | KcPBS2        |
| 23    | FRI-EL-C5     |
| 24    | FRI-EL-C2     |
| 25    | PBS SKS24     |
| 26    | PBS SKS26     |
| 27    | KcJk7         |
| 28    | CSNCRI-Guj-C3 |
| 29    | SKN-Big       |
| 30    | CSNCRI-Guj-C2 |
| 31    | KcPBS17       |
| 32    | Hissar local  |
| 33    | SKNJ2         |
| 34    | KcPBS13       |
| 35    | PBS SKS27     |
| 36    | CSNCRI-Guj-C5 |
| 37    | PBS SKS19     |
| 38    | CSNCRI-Guj-C4 |
| 39    | CSNCRI-Guj-C1 |

|    |           |
|----|-----------|
| 40 | KcPBS3    |
| 41 | KcJk4     |
| 42 | FRI-EL-C4 |
| 43 | PBS SKS23 |
| 44 | Hansraj   |
| 45 | PBS SKS18 |
| 46 | FRI-EL-C3 |
| 47 | FRI-EL-C1 |
| 48 | PBS SKS28 |
| 49 | KcPBS10   |

**Table S2: SSRs, which can be synthesized and tested on *Jatropha* as well as castor bean to detect polymorphisms**

| SSR locus | SSR motif | SSRs position corresponding to gene | Primer F                   | Primer R                  |
|-----------|-----------|-------------------------------------|----------------------------|---------------------------|
| JM38      | (AT)21    | 5'UTR                               | TTAGATTCAGTCTTTAGGCTTGCT   | TTGAACTTCTTACTCATTGCTCGTG |
| JM39      | (TA)22    | 5'UTR                               | ACTCAACACCAATCATTTCCATCTC  | GAAGAGGAGAGCACCCAGTGTT    |
| JM40      | (TTA)23   | 5'UTR                               | AGTTCGACTAGTTCCACCAGAATTG  | ATTGCCTTCCTCGTCCTAGAGTAAT |
| JM41      | (AT)22    | 5'UTR                               | TAGCAACAACCTCTATTTAAGCTCAC | AGCGTTAGAATGTTGACTCATCCA  |
| JM42      | (TA)22    | 5'UTR                               | TTTGAGTGCTCCTATTTGGCTAGAA  | CAAATGACAAGTAGGCAGAACTTT  |
| JM43      | (ATA)22   | 5'UTR                               | TCATAATCGGTCTATTCTTCGTGCT  | TTGGTCGTTGTATGGTTAGTCAAAG |
| JM44      | (TA)25    | 5'UTR                               | CATTTGTGTGTGCCCATTTTCATTAG | CATTATGGATTAGAAGCATGTCACC |
| JM45      | (TA)22    | 5'UTR                               | GAGGTACAAGAGAGAAAGCCAACA   | CATAGACGCATGTAAATGAGATGG  |
| JM46      | (TA)23    | 5'UTR                               | GATTTAGAAATGGTAATAGGGCGG   | GACCTATCCGTGTCGTGTAGATTT  |
| JM47      | (AT)25    | 5'UTR                               | ATTCAGGCCATCCACATAGTCTAAC  | GACCCTATTGATTGATTTAAGAGCC |
| JM48      | (TTA)22   | 5'UTR                               | CAGAAACTCGGTAGAACTGTGAGT   | GCATAATCTACTGTTATCTCATCCC |
| JM49      | (AG)24    | 5'UTR                               | TTCTCCAAAGCCAGAGATAGACATT  | ACCTCTCAACAGGATTTGAACACTC |
| JM50      | (AT)24    | 5'UTR                               | AAGATCGATACTTATAAGGTTTGCC  | TGGCCGCATATCTTAGTCATTCTA  |
| JM51      | (TA)23    | 5'UTR                               | GCAACTGAACATAACCAGCCATAA   | CATACCCATTGTTGCCCTTGATATT |
| JM52      | (TA)23    | 5'UTR                               | AATTAACAGTACTGCCACATGGTCC  | CCAACCGTTACCCATTTGATATAGT |
| JM53      | (AT)25    | intron                              | GTACATGAATGAATCGAATCGCAC   | TGTGTTATTGGAGATGGTGATGGT  |
| JM54      | (TA)22    | intron                              | GCCTCATCCTCACATTACACACTTT  | CTTGGAGCATTAGTTAAACCAAACG |
| JM55      | (TA)22    | intron                              | GAGGCACGACAAATTAAGAATAGA   | GAGCCAAAGATTGTGGTTATAATGG |
| JM56      | (AT)24    | intron                              | CAGACCCATCTGATCATCATTGTAG  | TCCTCAGGTAAATTGCTCATCTTTC |
| JM57      | (TC)23    | intron                              | AAATTACTTCCAGAGACGAATGCCT  | CTCACCAACAGGGTAATTTACATGC |
| JM58      | (AT)22    | intron                              | CTTGTTGGAGGGAAGAGAAATAAT   | TTTACATCATCTAGCGTGCCATGTT |
| JM59      | (TC)23    | intron                              | AATTTAGAAGCCACATTTGAGACG   | CTATGTAACCCAAGAAAGACGATG  |
| JM60      | (GA)22    | intron                              | GGATCATCTATGCTTGTAGCGAACT  | TTAACAGAGTGAAGGATTTGCCTGT |
| JM61      | (TA)22    | Non genic                           | CAAGTCACACTATACGTCAATCCAA  | TACCCGATAAGTACCAATACGCAA  |

|      |         |              |                                |                           |
|------|---------|--------------|--------------------------------|---------------------------|
| JM62 | (TC)24  | Non<br>genic | GCATTGATATTGAACACTGGACATC      | TAGACATTAGCACAGGCTCAGGAT  |
| JM63 | (TC)23  | Non<br>genic | ATCAGAAGCCCAATACATCAAAGA<br>G  | GATTCCTACATATAGCCAATGGGA  |
| JM64 | (AT)21  | Non<br>genic | TAGCAAACCTATACACAGGGTTTGG<br>C | AACGCGCACGTTGATAAATAGAAT  |
| JM65 | (TA)22  | Non<br>genic | CAAGTCACACTATACGTCAATCCAA      | TACCCGATAAGTACCAATACGCAA  |
| JM66 | (AT)25  | Non<br>genic | CGTGCCTAAATCCTGTCACTATCTT      | CACACACACACACACACACACATA  |
| JM67 | (TC)24  | Non<br>genic | GCATTGATATTGAACACTGGACATC      | TAGACATTAGCACAGGCTCAGGAT  |
| JM68 | (TC)23  | Non<br>genic | ATCAGAAGCCCAATACATCAAAGA<br>G  | GATTCCTACATATAGCCAATGGGA  |
| JM69 | (TTA)23 | Non<br>genic | GCCACAATAATCACAAGGGATAAA<br>C  | GTAGCTTCCATCAATCCAGAAGAAA |
| JM70 | (AT)24  | Non<br>genic | GCAATGTGGGAGAAATACAAACTT<br>C  | GGTAGGCATTCATGCCAGTCTAATA |
| JM71 | (TA)22  | Non<br>genic | ACTCAACACCAATCATTTCATCTC       | GCATTGGGTATTGTACCCTCTCTTA |
| JM72 | (GT)21  | Non<br>genic | ACTATGGGAGACCATACAGGGAAA       | ATAAGGCGAGCTTGTGTATCAACAT |
| JM73 | (TA)24  | Non<br>genic | GGGTGTATTCAATTTGCGAGTAAAG      | TGTTGTGTGTGTGTCTCTCTCTCTC |
| JM74 | (TA)25  | Non<br>genic | TAGCTATTCTCATCATTCCCTCCACC     | GTCAAAGGTACGCTTCTTGACCTAA |
| JM75 | (AT)24  | Non<br>genic | ATGTTCCCTTTCTACGTCTCTTCCT      | TCTTCTCTCTAACGCACTCCTGAAT |
| JM76 | (AT)24  | Non<br>genic | TCACTTGTTGGGATCTTCTTTAACC      | AAAGTCGCCAATTCAGTAATCAGAC |
| JM77 | (AT)24  | Non<br>genic | GATGACATTATTGCCTTCTATTGGG      | AGCTACTCCCTCCTCTCAAATCCTA |
| JM78 | (TA)24  | Non<br>genic | GATGTGATTCGACTTTATGTCGTTG      | ACAAGCGTACTACTACAAACTAGGG |
| JM79 | (AT)17  | 5'UTR        | AACACCAATCATTTCATCTCAGTC       | ATGTAGAGCAAGCCTAAAGCAGTG  |
| JM80 | (TA)15  | 5'UTR        | GGAAAGCCCAAGAAGCTTGAAA         | CATGTATAATTTGAGGGATGGCTTC |
| JM81 | (GA)16  | 5'UTR        | GTAAAGTCAAACGTTGTGTTTGTGG      | CTTAGCTCATTCCTTGGAGTTGAAG |
| JM82 | (AG)20  | 5'UTR        | AAGAGGATGACCAATGAAGAAAGA       | ATTAAACCTCTCCCTTCCCTTCTCT |
| JM83 | (ATT)18 | 5'UTR        | AGATTACTTAGAGTTGCAGGCATTG      | AAGGTTCAAGAGAGTGAAGGTTGA  |
| JM84 | (CT)15  | 5'UTR        | TTTCCAAGATATACTCTCGAGGTGC      | GAGTGAGTGAGTGAAAGGTGGATA  |
| JM85 | (GA)18  | 5'UTR        | CAGATAAACGAAACCCTAAATTCC<br>C  | GATACATTACCTCTTCCCAGCTTA  |
| JM86 | (TA)15  | 5'UTR        | AACGAGTGAAGAAGAACTTTGGA        | TCTGTTGAATACCTTCGTTACAGCA |
| JM87 | (TC)15  | 5'UTR        | CTGCCCTAACACCAATAAGTGAATC      | ACCTCATGTCTTCTCTGTCACTGGT |
| JM88 | (TA)16  | 5'UTR        | TTGCCAAGTGTAAGCTGATTGA         | AGTTATTTGTGCACTGTTGACGTGT |
| JM89 | (AT)19  | 5'UTR        | GCGCCTATCTTGAGAAATATTGTGA      | AATGTAAGGAGAAGGTGAAAGCCT  |
| JM90 | (TA)16  | 5'UTR        | TTCCATGTCCTAGTTTCTTTCTTGG      | GCTTCCATATCTCTCTCTTTTCCC  |

|       |         |        |                               |                            |
|-------|---------|--------|-------------------------------|----------------------------|
| JM91  | (AT)16  | 5'UTR  | GCTAGCAATTGGCCAAACTAAGAT      | CGTTTATCTGTGTGTTACACGTCTG  |
| JM92  | (GA)17  | 5'UTR  | CTGCAAGAAGAATAGAGAAACAGG      | GTCGTCTCCAGAGAATTAAGGGAG   |
| JM93  | (TC)18  | 5'UTR  | GCCTTTAAGAGATTGATGGCAACTA     | AAGTATTCATATGCCCTAAGCCTCC  |
| JM94  | (AT)18  | 5'UTR  | CATAGTTTCGGCTTAATCAACGAGT     | CGGCTTGTGAGTAATAAGTTGGTCT  |
| JM95  | (AT)21  | 5'UTR  | AGGGTCAGAAGTACACAAGTGAAT      | AATTTCTTCTGCAGGCTAAATGGTC  |
| JM96  | (CT)17  | 5'UTR  | TTAGGTGAAGCAAAGAAAGTGA        | GATGCAACTATTAGACGCAGTTTGA  |
| JM97  | (AG)18  | 5'UTR  | AGCACTCAGTCCACTGAAATAAAC<br>C | TTATTATGCTTGTGCTGGCTACTCA  |
| JM98  | (GA)20  | 5'UTR  | TGATGGCTCAAGTACAAGTTCTAGG     | TTTGTGAGTACACAGAGAGAGAAA   |
| JM99  | (TC)17  | 5'UTR  | GAGTCACAACCTCATAACCCTTTCGT    | GGAGAAGGAGAAGAGTGATAAAGG   |
| JM100 | (TA)16  | 5'UTR  | TTGGCCTAATACAACAGTCAACAA<br>G | CGGATTAACGCCATTTAGAATAACC  |
| JM101 | (AG)18  | 5'UTR  | TTGTTGAGAGTGAGTAGCATTGGA<br>G | AACTGTCGAATTGCTTAAATCCACC  |
| JM102 | (TA)16  | 5'UTR  | ATCATACCATATCTGGCAGGGTAA<br>A | TTTAAAGGAATTGGTAGGGCAAGT   |
| JM103 | (CT)22  | 5'UTR  | GCATGCAAACCCTGAATTATGTACT     | TGCTGACTCTGTTTCTCCTTCTACTT |
| JM104 | (AT)17  | 5'UTR  | TCTCCCTCCCGGAATAGTGATTTA      | AGTAATATTGGCCCTAAGTCGGAAT  |
| JM105 | (TAA)17 | 5'UTR  | AGCTTGGTTTGTTCATAAAGGTCAC     | AAAGCACACGAAGCTAATCTTTCAC  |
| JM106 | (GA)16  | 5'UTR  | GAGATTAGCCAAAGAAATGTGAAG      | AATAACCTGACACTAAAGTGGCTCC  |
| JM107 | (AT)16  | 5'UTR  | TTGCAGTCCTATCTAACAAATTAGG     | GTTGGACCTTCTTTGAGTTGTCTTC  |
| JM108 | (AT)20  | 5'UTR  | ATGTCTCTTCAGCAATCCATTCTTC     | GTTTCTTATGGGTCGGTTCTGTATG  |
| JM109 | (AG)16  | 5'UTR  | ATGTCTCTTCAGCAATCCATTCTTC     | GTTTCTTATGGGTCGGTTCTGTATG  |
| JM110 | (AT)16  | 5'UTR  | CGTCCATGTGTATTGTATGAAGATG     | TGTCCATTATACAGCTATCCCATGA  |
| JM111 | (CT)17  | 5'UTR  | TGAAAGCAAACAAAGAGGTCCTC       | ATGATCAGTTGCAGATGAGGTGTTA  |
| JM112 | (AT)20  | 5'UTR  | TCATCGAATGGTAGAGAACTAATG<br>G | TTAATTCGGATTCTGAGTCTTGAGG  |
| JM113 | (TA)16  | 5'UTR  | CTTTCCTTTGCCATGTACTTTCATC     | TTACATTGACATCCAGTGGCTAGAA  |
| JM114 | (TA)18  | intron | TCCGGAGCTTGACTAGAAGATAGA<br>A | GGCAGTTTCAGAGAGTCTTACAACC  |
| JM115 | (AT)16  | intron | CTCTCTGAAGGTTTAACACAACGCT     | CATAAGCGCTTTAATTTAGGACTGC  |
| JM116 | (TA)17  | intron | CTGTAGTGGACTGCTGTCACTTGTT     | GCACTTAGAAAGACTCTTAGCCAGC  |
| JM117 | (CT)18  | intron | CATAGCATAGCATAGCAAGTGGAT<br>G | GAAGGGATACTGCAGACATTAGAA   |
| JM118 | (TA)17  | intron | TTCTCTAGATTATGCACAGCACAGC     | ACATGGTGGACATTATCACTCACAA  |
| JM119 | (CT)17  | intron | TCAACTTCTACTTCAAACACGCATC     | CATACTTGGTCCTGATGTACTGTGA  |
| JM120 | (TA)17  | intron | AAACACGCATCTATTACACCATCCT     | CATACTTGGTCCTGATGTACTGTGA  |
| JM121 | (TA)18  | intron | AGATAACGAGATCGATGACAACAC      | AGGGAGAATATTGGTTTCAAAGGT   |
| JM122 | (ATT)16 | intron | AAACGGGTCCCAAACCTATCTC        | GGTTTGATGCCTAAATTGTGAGGT   |
| JM123 | (CT)17  | intron | TCAACTTCTACTTCAAACACGCATC     | CATACTTGGTCCTGATGTACTGTGA  |
| JM124 | (TA)17  | intron | AAACACGCATCTATTACACCATCCT     | CATACTTGGTCCTGATGTACTGTGA  |
| JM125 | (TA)20  | intron | GAATATGGACTAACGTGGTTTGCTT     | ATTGCTGGAACCTAGCAGTCAATTC  |

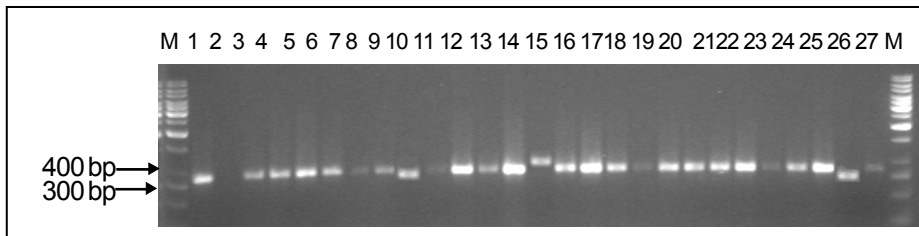

**Figure S1: Polymorphisms in amplicon size for intronic SSR (TC)23 at locus JM8 in *Jatropha* genotypes (1-27)**

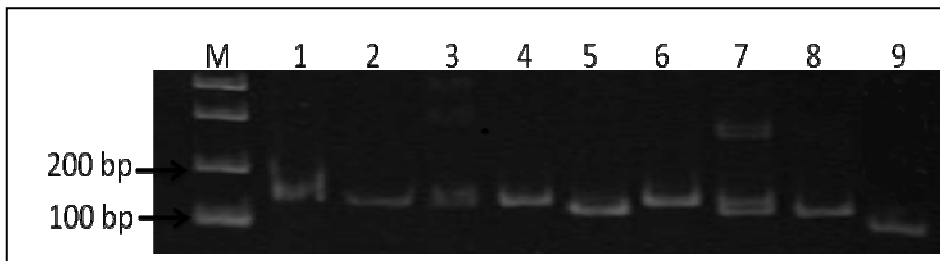

**Figure S2: M =Molecular weight marker; Polymorphism at SSR locus JM22 (5'UTR) (AT)29 on *Jatropha* species (1- *J.maheshwarii*, 2- *J.multifida*, 3- *J.gossypifolia*, 4- *J.podagrica*, 5- *J.glandulifera*, 6- *J.curcas*, 7- *J.tanjorensis*, 8- *J.villosa*, 9- *J.integerrima*)**
